# Supplementary material for: Keeping Low Reproductive Number Despite the Rebound Population Mobility in Korea, a Country Never under Lockdown during the COVID-19 Pandemic
Source: MDPI journal article supplement (doi:10.3390/ijerph17249551), 2020-12-20
Supplement: s1 [file s1]

## Model Description

The COVID-19 transmission dynamics can be described by the following ordinary differential equations (ODEs). The total population ( $N$ ) is divided into five compartments: susceptible ( $S$ ), exposed ( $E$ ), infectious ( $I$ ), confirmed and isolated ( $C$ ), and recovered ( $R$ )

$$\begin{aligned}\frac{dS}{dt} &= -\beta(t) \frac{SI}{N} \\ \frac{dE}{dt} &= \beta(t) \frac{SI}{N} - \kappa E, \\ \frac{dI}{dt} &= \kappa E - \alpha I, \\ \frac{dC}{dt} &= \alpha I - \gamma C, \\ \frac{dR}{dt} &= (1-f)\gamma C,\end{aligned}$$

where  $N = S + E + I + C + R$ .

An individual in susceptible group is moved to the exposed group by transmission from the infectious individuals. The time dependent function  $\beta(t)$  represents the transmission rate affected by the government policy. According to the social distancing level the transmission rate is changed. The number of transmitted individuals is represented by the term  $\beta(t) \frac{SI}{N}$ . The exposed individuals are moved to the infectious individuals. The parameter  $\kappa$  indicates rate of progression from exposed to infectious. The infectious individuals are confirmed and isolated. The confirmation rate (or isolation rate) is represented by a parameter  $\alpha$ . The term  $\alpha I$  indicates the daily number of reported cases and  $\int_0^t \alpha I dt$  is the number of cumulated cases. The time dependent function  $I(t)$  indicates the number of prevalence at time  $t$ . The infectious individuals are recovered at a rate of  $\gamma$ . The parameter  $f$  means fatality rate of the COVID-19 disease ( $0 \leq f \leq 1$ ).
